# Supplementary material for: Somatic cAMP signaling regulates MSP-dependent oocyte growth and meiotic maturation inC. elegans
Source: Oxford University Press journal article supplement (doi:10.1242/dev.034595), 2009-06-05
Supplement: dev034595tables1.pdf [file dev034595tables1.pdf]

**Table S1. RNAi of *acy-1*, *acy-2* or *acy-3* does not block fertility**

| RNAi treatment of wild-type hermaphrodites | % Fertility (n)        |
|--------------------------------------------|------------------------|
| Control RNAi*                              | 100% (20)              |
| <i>acy-1</i> (RNAi)                        | 100% (26) <sup>†</sup> |
| <i>acy-2</i> (RNAi)                        | 100% (20) <sup>†</sup> |
| <i>acy-3</i> (RNAi)                        | 100% (32) <sup>†</sup> |
| <i>gsa-1</i> (RNAi) <sup>‡</sup>           | 0% (20)                |

Control RNAi was L4440. RNAi was used for *acy-1* and *acy-2* because deletion mutations are lethal.

<sup>†</sup>No apparent defects in meiotic maturation or ovulation were observed by DIC microscopy. The identity of the clones was verified by DNA sequencing.

<sup>‡</sup>In our prior analysis, we concluded that it was unclear which of the four *acy* genes participates in the regulation of meiotic maturation (Govindan et al., 2006). We noted, however, that some *acy-1*(*ce2gf*) gain-of-function (*gf*) females exhibited slightly de-repressed meiotic maturation rates and thus incorporated an involvement of *acy-1* in our model (Govindan et al., 2006). The finding that *acy-4* is required for oocyte meiotic maturation and fertility is sufficient to explain the requirement for *gsa-1*. We cannot eliminate the possibility that *acy-1*, *acy-2* or *acy-3* might augment the essential function of *gsa-1* and *acy-4*. A weak involvement of *acy-1*, *acy-2* or *acy-3* might explain the weak suppression of *acy-4*(*lf*) infertility by phosphodiesterase inhibitors (see Fig. S2 in the supplementary material)
