# Supplementary material for: Somatic cAMP signaling regulates MSP-dependent oocyte growth and meiotic maturation inC. elegans
Source: Oxford University Press journal article supplement (doi:10.1242/dev.034595), 2009-06-05
Supplement: dev034595tables2.pdf [file dev034595tables2.pdf]

**Table S2. Low frequency of meiotic maturation in *acy-4(lf)* mutants**

| Genotype             | Gonad arms containing endomitotic oocytes |                          |                          |                          |
|----------------------|-------------------------------------------|--------------------------|--------------------------|--------------------------|
|                      | 1-day adult ( <i>n</i> )                  | 2-day adult ( <i>n</i> ) | 3-day adult ( <i>n</i> ) | 4-day adult ( <i>n</i> ) |
| Wild type            | 0% (30)                                   | 0% (22)                  | 0% (12)                  | 0% (10)                  |
| <i>acy-4(ok1806)</i> | 0% (34)                                   | 13% (38)                 | 22% (30)                 | 23% (25)                 |

Meiotic maturation was examined in *acy-4(lf)* mutants over longer periods. The sterility defect of *acy-4(lf)* mutants is not due to a failure in ovulation because no endomitotic oocytes, which result from defective ovulation, were observed in 1-day adults. Instead, the *acy-4(lf)* oocytes of 1-day-old adults contain six bivalents within the nucleus that are in diakinesis of prophase I. With time, stochastic meiotic maturation occurs at low frequency in *acy-4(lf)* mutants, as it does in females; however, ovulation is also blocked, and a few endomitotic oocytes accumulate in the gonad arm at later times. The few oocytes that are ovulated in unmated females become endomitotic in the uterus.
