# Supplementary material for: Somatic cAMP signaling regulates MSP-dependent oocyte growth and meiotic maturation inC. elegans
Source: Oxford University Press journal article supplement (doi:10.1242/dev.034595), 2009-06-05
Supplement: dev034595tables3.pdf [file dev034595tables3.pdf]

**Table S3. Analysis of AIR-2::GFP localization in female backgrounds**

| Gene (RNAi)*   | Extended AIR-2::GFP localization in unmated <i>fog-2(oz40)</i> females† |
|----------------|-------------------------------------------------------------------------|
| Control‡       | 0                                                                       |
| <i>goa-1</i> # | -                                                                       |
| <i>gpb-1</i>   | -                                                                       |
| <i>inx-22</i>  | +                                                                       |
| <i>inx-14</i>  | +                                                                       |
| <i>par-5</i>   | -                                                                       |
| <i>kin-2</i>   | +                                                                       |
| <i>rpt-3</i>   | -                                                                       |
| <i>arf-1.1</i> | -                                                                       |
| <i>ptc-1</i>   | -                                                                       |
| <i>vab-1</i>   | -                                                                       |
| <i>ran-1</i>   | -                                                                       |
| <i>phi-11</i>  | -                                                                       |
| <i>dab-1</i>   | -                                                                       |
| <i>vav-1</i>   | -                                                                       |
| <i>pkc-1</i>   | -                                                                       |
| <i>pqn-19</i>  | -                                                                       |
| <i>gsa-1</i>   | 0                                                                       |

\*RNAi of negative regulators of meiotic maturation (Govindan et al., 2006) was conducted on *fog-2(oz40)* females containing *Itls14[pie-1p-*air-2::gfp]**. All analysis in this table was done in the absence of sperm. For the results of MSP injections into *fog-2(oz40)* females on AIR-2::GFP localization see main text.

†The localization of AIR-2::GFP was characterized as having an 'extended' pattern (+) if all proximal oocytes (-1 to -3) in a gonad arm exhibited chromatin-localized AIR-2::GFP. Most negative regulators only exhibited AIR-2::GFP localization to the -1 oocyte (-). At least ten gonad arms were analyzed.

‡The control was L4440 empty vector RNAi; no chromatin localization of AIR-2::GFP was observed (0).

#*goa-1(RNAi)* in a *Itls14* hermaphrodite background does not display extended AIR-2::GFP.
