# Supplementary material for: Somatic cAMP signaling regulates MSP-dependent oocyte growth and meiotic maturation inC. elegans
Source: Oxford University Press journal article supplement (doi:10.1242/dev.034595), 2009-06-05
Supplement: dev034595tables4.pdf [file dev034595tables4.pdf]

**Table S4.  $G\alpha_s$ -ACY-4 signaling promotes oocyte production**

| Genotype                             | Number of oocytes produced (per gonad arm)* |              |              |
|--------------------------------------|---------------------------------------------|--------------|--------------|
|                                      | 16 hours (n)                                | 24 hours (n) | 36 hours (n) |
| Wild type                            | 24±6 (15)                                   | 56±9 (14)    | 97±16 (15)   |
| <i>fog-2(oz40)</i> , unmated         | 14±2 (39)                                   | 18±1 (29)    | 18±2 (30)    |
| <i>gsa-1(RNAi)</i>                   | 8±2 (30)                                    | 10±2 (27)    | 10±2 (26)    |
| <i>acy-4(ok1806)</i>                 | 8±2 (15)                                    | 10±2 (39)    | 10±3 (36)    |
| <i>oma-1(zu405te33); oma-2(te51)</i> | 10±2 (36)                                   | 13±2 (41)    | 14±2 (41)    |

\*Cumulative totals of all oocytes produced per gonad arm 16 hours, 24 hours and 36 hours after the mid-L4 stage.
