# Supplementary figures and images for: Somatic cAMP signaling regulates MSP-dependent oocyte growth and meiotic maturation inC. elegans
Source: Oxford University Press journal article supplement (doi:10.1242/dev.034595), 2009-06-05

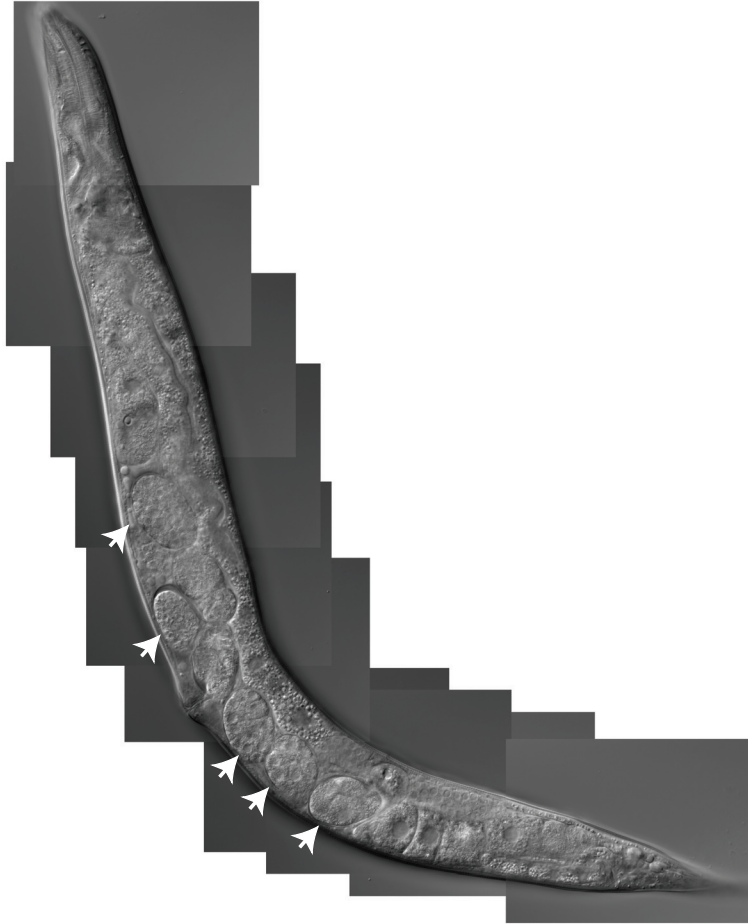

Supplement: dev034595-sup-034595-figs2.pdf [file dev034595-sup-034595-figs2.pdf]

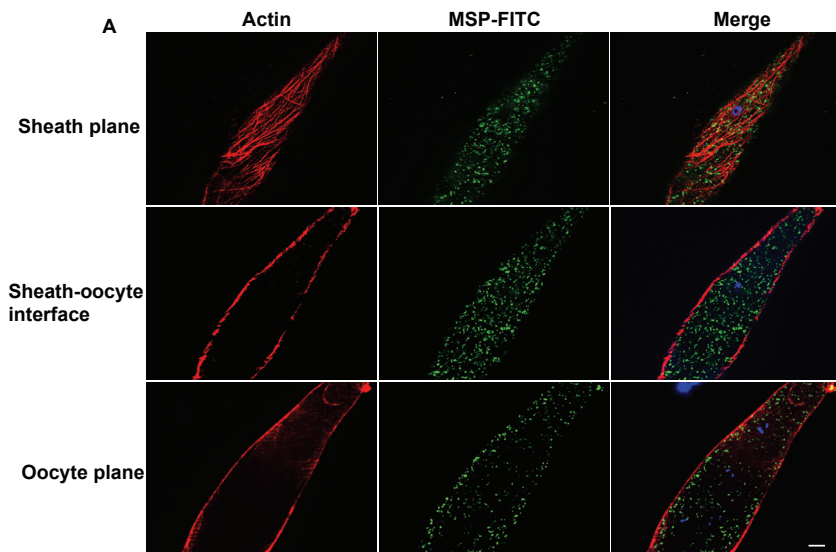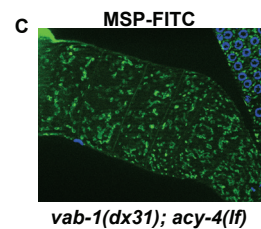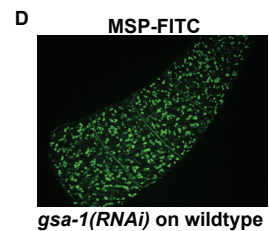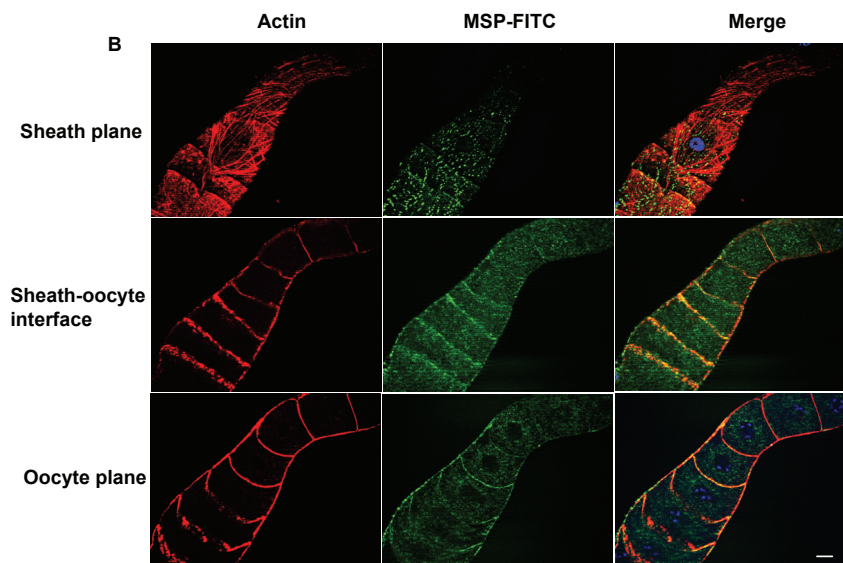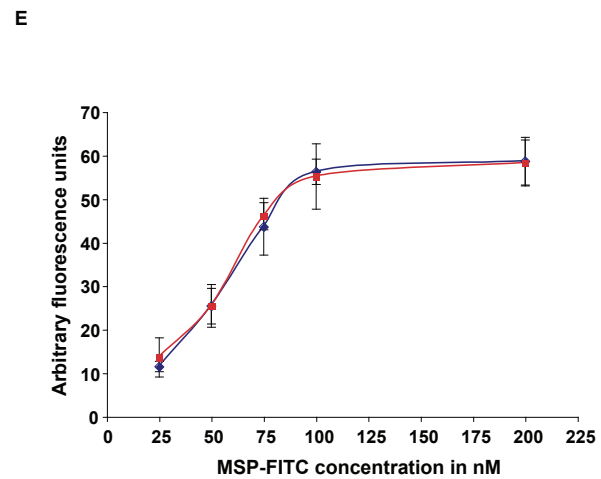

Supplement: dev034595-sup-034595-figs3.pdf [file dev034595-sup-034595-figs3.pdf]

DIC

PGL-1::GFP

WT

*inx-14(tm2864)*

*inx-14(RNAi)*

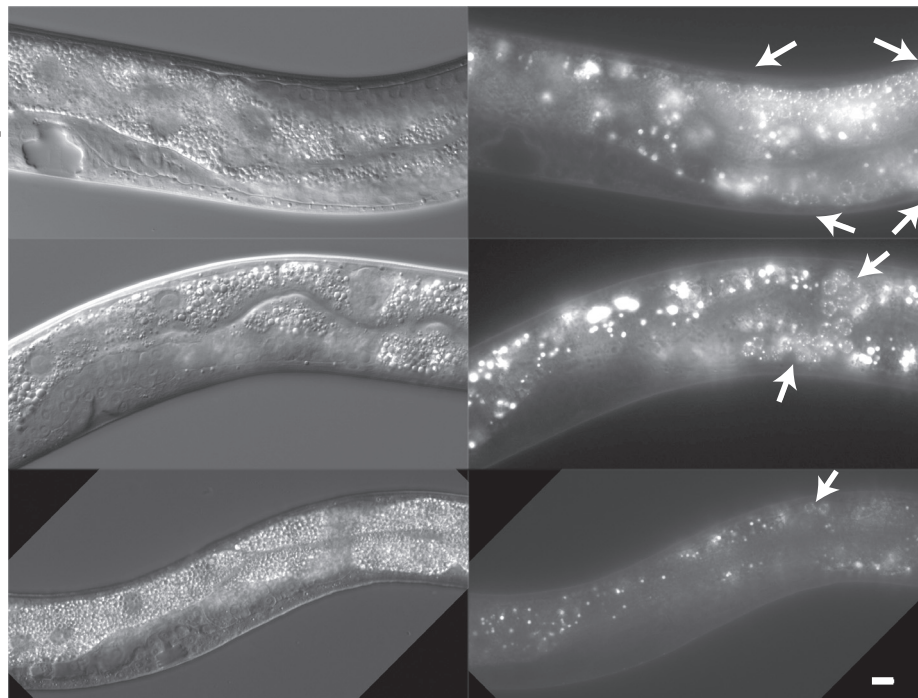

Supplement: dev034595-sup-034595-figs4.pdf [file dev034595-sup-034595-figs4.pdf]

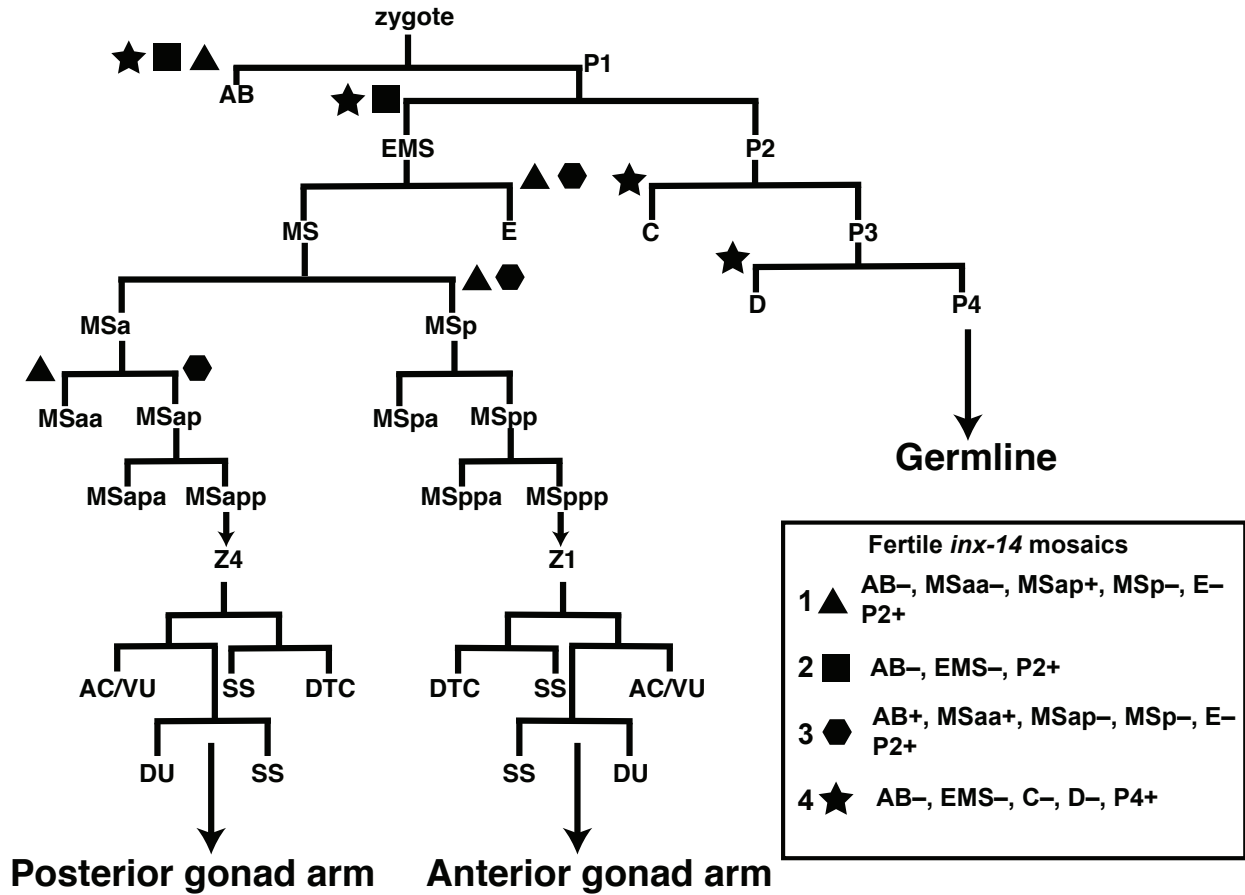

Supplement: dev034595-sup-034595-figs5.pdf [file dev034595-sup-034595-figs5.pdf]
